# Supplementary material for: Purification and characterization of hypoglycemic peptides from traditional Chinese soy-fermented douchi
Source: Royal Society of Chemistry journal article supplement (doi:10.1039/d1fo03941e), 2022-01-01
Supplement: d1fo03941e1.pdf [file d1fo03941e1.pdf]

## Purification and characterization of hypoglycemic peptides from traditional Chinese soy-fermented douchi

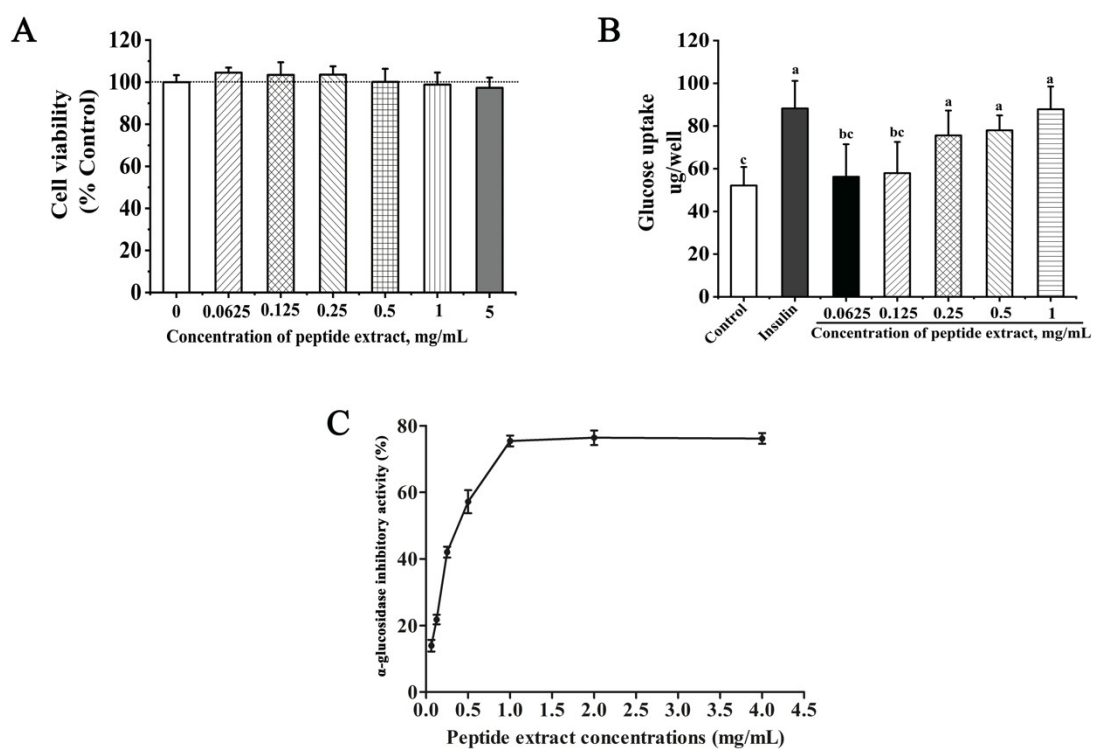

Figure S1. Effect of peptide extract on cell viability and glucose uptake in L6 myotubes.

(A) Effect of peptide extract on cell viability. The cells were incubated with peptide extract samples (0.0625 mg/mL, 0.125 mg/mL, 0.25 mg/mL, 0.5 mg/mL, 1 mg/mL and 5 mg/mL) for 24 h. The control group was set as DMEM medium containing cells and the DMEM medium without cells was set as the blank group at the same culture conditions for 24 h. Cell viability was measured using CCK-8 assay. (B) Effect of different concentrations of peptide extract on glucose uptake in L6 myotubes. (C) Inhibitory effects of peptide extract against  $\alpha$ -glucosidase.

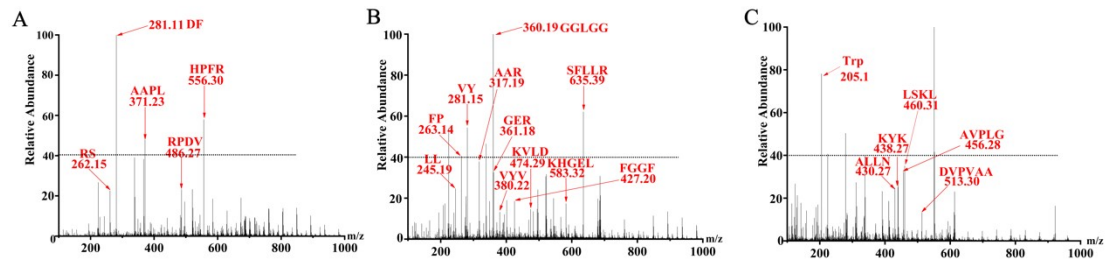

Figure S2. Identification and analysis of hypoglycemic peptides by LC-MS/MS. Spectra were recorded over the mass/charge ( $m/z$ ) ranges of 100-1000 in MS mode. (A) MS spectrum of fraction F4-1-6; (B) MS spectrum of fraction F4-1-9; (C) MS spectrum of fraction F4-3-12.

Table S1 Amino acid composition of the fractions of peptide extract.

| Amino acid          | Contents (g/100g dry sample) |                         |                         |                         |
|---------------------|------------------------------|-------------------------|-------------------------|-------------------------|
|                     | F1                           | F2                      | F4                      | F6                      |
| Asp(Aspartic acid)A | 1.27±0.13 <sup>ab</sup>      | 2.04±0.52 <sup>a</sup>  | 1.30±0.13 <sup>ab</sup> | 0.94±0.04 <sup>b</sup>  |
| Glu(Glutamic acid)E | 2.29±0.10 <sup>b</sup>       | 4.39±0.37 <sup>a</sup>  | 2.40±0.08 <sup>b</sup>  | 1.53±0.07 <sup>c</sup>  |
| Ser(Serine)S        | 0.64±0.01 <sup>b</sup>       | 1.00±0.04 <sup>a</sup>  | 0.51±0.05 <sup>c</sup>  | 0.47±0.01 <sup>c</sup>  |
| Gly(Glycine)G       | 0.81±0.02 <sup>bc</sup>      | 0.98±0.06 <sup>b</sup>  | 1.28±0.10 <sup>a</sup>  | 0.72±0.04 <sup>c</sup>  |
| His(Histidine)H     | 0.52±0.01 <sup>b</sup>       | 0.61±0.04 <sup>ab</sup> | 0.62±0.05 <sup>a</sup>  | 0.63±0.01 <sup>a</sup>  |
| Arg(Arginine)R      | 4.37±0.09 <sup>a</sup>       | 4.37±0.04 <sup>b</sup>  | 3.45±0.03 <sup>a</sup>  | 1.33±0.07 <sup>b</sup>  |
| Thr(Threonine)T     | 3.22±0.27 <sup>a</sup>       | 3.11±0.03 <sup>b</sup>  | 1.90±0.04 <sup>d</sup>  | 2.48±0.17 <sup>c</sup>  |
| Ala(Alanine)A       | 0.75±0.01 <sup>b</sup>       | 1.00±0.03 <sup>a</sup>  | 0.40±0.08 <sup>c</sup>  | 0.43±0.02 <sup>c</sup>  |
| Pro(Proline)P       | 1.13±0.04 <sup>b</sup>       | 1.77±0.10 <sup>a</sup>  | 1.56±0.06 <sup>a</sup>  | 1.18±0.11 <sup>b</sup>  |
| Tyr(Tyrosine)Y      | 1.24±0.04 <sup>b</sup>       | 1.33±0.014 <sup>b</sup> | 4.89±0.07 <sup>a</sup>  | 0.47±0.03 <sup>c</sup>  |
| Val(Valine)V        | 1.10±0.05 <sup>c</sup>       | 1.47±0.07 <sup>b</sup>  | 0.73±0.02 <sup>a</sup>  | 0.39±0.01 <sup>d</sup>  |
| Met(Methionine)M    | 0.40±0.01 <sup>b</sup>       | 0.53±0.02 <sup>a</sup>  | 0.34±0.04 <sup>bc</sup> | 0.27±0.03 <sup>c</sup>  |
| Cys(Cysteine)C      | 1.66±0.09 <sup>a</sup>       | 1.61±0.04 <sup>a</sup>  | 1.36±0.03 <sup>b</sup>  | 1.22±0.01 <sup>b</sup>  |
| Ile(Isoleucine)I    | 1.35±0.03 <sup>b</sup>       | 1.57±0.08 <sup>a</sup>  | 2.50±0.08 <sup>c</sup>  | 0.60±0.03 <sup>d</sup>  |
| Leu(Leucine)L       | 1.89±0.14 <sup>ab</sup>      | 2.76±0.16 <sup>ab</sup> | 3.72±0.07 <sup>a</sup>  | 0.53±0.04 <sup>b</sup>  |
| Phe(Phenylalanine)F | 2.21±0.08 <sup>b</sup>       | 1.80±0.12 <sup>bc</sup> | 8.11±0.04 <sup>a</sup>  | 1.61±0.30 <sup>c</sup>  |
| Lys(Lysine)K        | 0.49±0.01 <sup>d</sup>       | 1.50±0.09 <sup>b</sup>  | 1.12±0.09 <sup>a</sup>  | 0.85±0.02 <sup>c</sup>  |
| HAA <sup>1</sup>    | 11.73±0.17 <sup>b</sup>      | 13.85±0.38 <sup>b</sup> | 23.60±0.23 <sup>a</sup> | 6.70±0.24 <sup>c</sup>  |
| PCAA <sup>2</sup>   | 5.38±0.09 <sup>c</sup>       | 5.17±0.08 <sup>c</sup>  | 6.50±0.10 <sup>a</sup>  | 2.82±0.08 <sup>b</sup>  |
| NCAA <sup>3</sup>   | 3.56±0.22 <sup>b</sup>       | 6.42±0.89 <sup>a</sup>  | 3.70±0.05 <sup>b</sup>  | 2.48±0.11 <sup>b</sup>  |
| TAA <sup>4</sup>    | 25.35±0.63 <sup>c</sup>      | 30.53±0.48 <sup>b</sup> | 37.48±0.36 <sup>a</sup> | 15.67±0.18 <sup>d</sup> |

<sup>1</sup>HAA (hydrophobic amino acid): Ala; Cys; Ile; Leu; Met; Phe; Val; Tyr; Pro.

<sup>2</sup>PCAA (positively charged amino acid): Lys; His; Arg.

<sup>3</sup>NCAA (negatively charged amino acid): Asp and Glu.

<sup>4</sup>TAA: Total amino acid.

Different letters representing significant differences among the groups ( $p < 0.05$ ).

Table S2. Peptide sequences identified in fractions with glucose uptake stimulatory activity from the peptide extract of *douchi* by LC-MS/MS.

| Fraction | Sequence <sup>1</sup> | Observed m/z | Accession number <sup>2</sup> | Description <sup>3</sup>                              |
|----------|-----------------------|--------------|-------------------------------|-------------------------------------------------------|
| F4-1-6   | RS                    | 262.15       | P04347                        | 11S globulin [Glycine max]                            |
| F4-1-6   | DF                    | 281.11       | P04347                        | Glycinin G5 [Glycine max]                             |
| F4-1-6   | AAPL                  | 371.23       | gi 215398099                  | G13 protein [Glycine max]                             |
| F4-1-6   | RPDV                  | 486.27       | gi 1635577150                 | ATP-dependent zinc metalloprotease FTSH [Glycine max] |
| F4-1-6   | HPFR                  | 556.30       | gi 356541627                  | Sugar transportprotein 13 [Glycine max]               |
| F4-1-9   | LL                    | 245.19       | P04776                        | Glycinin G1 [Glycine max]                             |
| F4-1-9   | FP                    | 263.14       | P04405                        | Glycinin G2 [Glycine max]                             |
| F4-1-9   | VY                    | 281.15       | P13917                        | 7S globulin [Glycine max]                             |
| F4-1-9   | AAR                   | 317.19       | Q2TUW0                        | Anthocyanidin synthase [Glycine max]                  |

Continued

| Fraction | Sequence <sup>1</sup> | Observed m/z | Accession number <sup>2</sup> | Description <sup>3</sup>                                       |
|----------|-----------------------|--------------|-------------------------------|----------------------------------------------------------------|
| F4-1-9   | GGLGG                 | 360.19       | gi 574584690                  | ATP-dependent zinc metalloprotease FTSH 2 [Glycine max]        |
| F4-1-9   | GER                   | 361.18       | P25974                        | Beta-conglycinin beta subunit [Glycine max]                    |
| F4-1-9   | VYV                   | 380.22       | D0VBL6                        | Isoflavone synthase [Glycine max]                              |
| F5-Fr10  | FGGF                  | 427.20       | gi 356505340                  | 1,4-alpha-glucan-branching enzyme 1 [Glycine max]              |
| F4-1-9   |                       |              |                               | Microtubule-associated protein futsch isoform X3 [Glycine max] |
|          | KVLD                  | 474.29       | gi 95537486                   |                                                                |
| F4-1-9   | KHGEL                 | 583.32       | gi 955317737                  | Glutamate synthase [Glycine max]                               |
| F4-1-9   | SFLLR                 | 635.39       | gi 571503905                  | Root phototropism protein 3 isoform X1 [Glycine max]           |
| F4-3-12  | ALLN                  | 430.27       | gi 356553519                  | ABC transporter C family member 3 [Glycine max]                |
| F4-3-12  | KYK                   | 438.27       | Q39858                        | Soybean glycinin A3-B4 subunit [Glycine max]                   |
| F4-3-12  | AVPLG                 | 456.28       | gi 363814589                  | Peroxidase precursor [Glycine max]                             |
| F4-3-12  | DVPVAA                | 513.30       | gi 356576361                  | Acyl-CoA-binding domain-containing protein 6 [Glycine max]     |

<sup>1</sup>Peptide sequences are expressed by one letter amino acid code. Ala-A; Cys-C; Asp-D; Glu-E; Phe-F; Gly-G; His-H; Ile-I; Lys-K; Leu-L;

Met-M; Asn-N; Pro-P; Gln-Q; Arg-R; Ser-S; Thr-T; Val-V; Trp-W; Tyr-Y.

<sup>2</sup>Accession numbers of matched proteins are from the National Center for Biotechnology Information nonredundant sequence (NCBI nr) databases or the database (UniprotKB/SwissProt) search limited to Glycine max.

<sup>3</sup>A detailed description of the protein name.
